# Supplementary material for: Reveal the Regulation Patterns of Prognosis-Related miRNAs and lncRNAs Across Solid Tumors in the Cancer Genome Atlas
Source: Front Cell Dev Biol. 2020 May 25;8:368. doi: 10.3389/fcell.2020.00368 (PMC7261917; doi:10.3389/fcell.2020.00368)
Supplement: Supplementary file 3 [file Table_9.xlsx]

## Sheet: miRNA_marker_distribution
number	miRNA	cancer1	cancer2	cancer3	cancer4	cancer5	cancer6	cancer7	cancer8
1	hsa.miR.20a.5p	HNSC	THCA	LUAD	READ	KIRC	PRAD	CESC	UCEC
2	hsa.miR.152.3p	HNSC	LUAD	LUSC	LIHC	PRAD	BRCA	OV
3	hsa.miR.101.3p	LGG	HNSC	KIRP	BRCA	CESC	OV	SKCM
4	hsa.miR.331.3p	HNSC	READ	LIHC	KIRC	BRCA	OV	SKCM
5	hsa.miR.15a.5p	LGG	HNSC	THCA	KIRC	PRAD	BRCA	CESC
6	hsa.miR.26a.5p	HNSC	THCA	LUAD	READ	BRCA	CESC	OV
7	hsa.let.7g.5p	LUAD	LUSC	COAD	READ	KICH	BRCA	UCEC
8	hsa.miR.142.5p	LGG	BLCA	PRAD	BRCA	CESC	UCEC	SKCM
9	hsa.miR.9.5p	LGG	STAD	LIHC	KIRC	KIRP	PRAD	UCEC
10	hsa.miR.93.5p	HNSC	THCA	PRAD	CESC	OV	UCEC	SKCM
11	hsa.miR.23a.3p	LGG	HNSC	READ	PRAD	BRCA	SKCM
12	hsa.miR.28.5p	LGG	LUAD	STAD	BLCA	BRCA	SKCM
13	hsa.miR.146b.5p	LGG	HNSC	THCA	BLCA	KIRC	OV
14	hsa.miR.139.5p	THCA	LUAD	LIHC	BLCA	BRCA	OV
15	hsa.miR.17.5p	HNSC	THCA	READ	PRAD	CESC	OV
16	hsa.let.7i.3p	THCA	KIRC	KIRP	BRCA	CESC	SKCM
17	hsa.miR.145.5p	THCA	STAD	LIHC	KIRP	BRCA	OV
18	hsa.miR.103a.3p	HNSC	KIRC	KIRP	BRCA	OV	UCEC
19	hsa.miR.16.5p	LGG	LUSC	COAD	READ	BRCA	UCEC
20	hsa.miR.19b.3p	LGG	HNSC	PRAD	CESC	UCEC	SKCM
21	hsa.miR.93.3p	HNSC	THCA	LIHC	KICH	CESC	UCEC
22	hsa.miR.3607.3p	LUAD	LIHC	KICH	KIRC	BRCA
23	hsa.miR.25.3p	LGG	HNSC	LUSC	COAD	KIRP
24	hsa.miR.425.5p	HNSC	COAD	PRAD	BRCA	CESC
25	hsa.miR.20a.3p	LGG	HNSC	KIRP	PRAD	CESC
26	hsa.miR.10b.5p	LUSC	BLCA	KIRC	PRAD	BRCA
27	hsa.miR.148a.5p	HNSC	LUAD	READ	BLCA	KIRC
28	hsa.miR.150.5p	HNSC	PRAD	BRCA	CESC	SKCM
29	hsa.miR.451a	LGG	LUAD	PRAD	CESC	SKCM
30	hsa.miR.128.3p	READ	BLCA	KIRP	CESC	SKCM
31	hsa.miR.144.5p	LGG	LUAD	STAD	PRAD	CESC
32	hsa.miR.130a.3p	HNSC	READ	STAD	BRCA	CESC
33	hsa.miR.374a.3p	LUAD	READ	STAD	PRAD	CESC
34	hsa.miR.223.3p	HNSC	STAD	KIRC	CESC	SKCM
35	hsa.miR.29a.3p	LGG	THCA	LUAD	BRCA	CESC
36	hsa.let.7e.5p	LGG	THCA	LUAD	KICH	BRCA
37	hsa.let.7c.5p	HNSC	THCA	LUAD	PRAD	BRCA
38	hsa.miR.24.3p	THCA	LUAD	LIHC	PRAD	BRCA
39	hsa.miR.126.3p	HNSC	THCA	READ	BRCA	OV
40	hsa.miR.21.3p	THCA	COAD	LIHC	KIRP	SKCM
41	hsa.miR.500a.3p	LGG	HNSC	THCA	LIHC	SKCM
42	hsa.miR.501.3p	THCA	LUSC	COAD	LIHC	SKCM
43	hsa.miR.143.3p	HNSC	THCA	CESC	OV	SKCM
44	hsa.miR.186.5p	HNSC	THCA	KICH	OV	SKCM
45	hsa.miR.338.3p	HNSC	THCA	PRAD	CESC	SKCM
46	hsa.miR.342.3p	THCA	LUSC	READ	KIRP	SKCM
47	hsa.miR.98.5p	LUSC	COAD	KICH	KIRP	UCEC
48	hsa.miR.19a.3p	LGG	HNSC	THCA	CESC	UCEC
49	hsa.miR.660.5p	LGG	HNSC	THCA	KIRC	UCEC
50	hsa.miR.335.3p	LGG	COAD	BRCA	CESC
51	hsa.miR.21.5p	LIHC	BLCA	KIRC	BRCA
52	hsa.miR.769.5p	LGG	LIHC	BLCA	BRCA
53	hsa.miR.361.5p	LGG	HNSC	LIHC	KIRC
54	hsa.miR.146a.5p	LUSC	BLCA	BRCA	CESC
55	hsa.miR.330.5p	LGG	KIRC	KIRP	PRAD
56	hsa.miR.582.3p	HNSC	LIHC	KIRC	PRAD
57	hsa.miR.99b.3p	LGG	LUAD	READ	OV
58	hsa.miR.142.3p	LGG	BLCA	BRCA	SKCM
59	hsa.miR.29c.3p	LGG	LUAD	CESC	SKCM
60	hsa.miR.155.5p	LGG	LUSC	CESC	SKCM
61	hsa.miR.200c.3p	LGG	KICH	OV	SKCM
62	hsa.miR.106b.3p	READ	KIRC	BRCA	SKCM
63	hsa.miR.99b.5p	LGG	STAD	KIRP	OV
64	hsa.miR.100.5p	LGG	STAD	BRCA	SKCM
65	hsa.miR.486.5p	LUAD	STAD	CESC	SKCM
66	hsa.miR.452.5p	THCA	COAD	BRCA	CESC
67	hsa.miR.3065.3p	HNSC	THCA	KIRC	BRCA
68	hsa.miR.185.5p	HNSC	THCA	KIRC	BRCA
69	hsa.miR.125b.2.3p	HNSC	THCA	KIRP	BRCA
70	hsa.miR.301a.3p	HNSC	THCA	KIRP	CESC
71	hsa.miR.339.5p	HNSC	THCA	KIRP	CESC
72	hsa.miR.148a.3p	LGG	THCA	BLCA	KIRC
73	hsa.miR.27b.3p	LGG	HNSC	THCA	KIRC
74	hsa.miR.532.5p	LGG	THCA	LIHC	KIRC
75	hsa.miR.30c.5p	HNSC	THCA	READ	PRAD
76	hsa.miR.146b.3p	LGG	THCA	BRCA	SKCM
77	hsa.miR.143.5p	THCA	STAD	KIRC	BRCA
78	hsa.let.7b.5p	HNSC	COAD	BRCA	UCEC
79	hsa.miR.664a.3p	LGG	HNSC	PRAD	UCEC
80	hsa.let.7f.5p	THCA	LUAD	OV	UCEC
81	hsa.miR.374b.5p	HNSC	BRCA	CESC
82	hsa.miR.30b.5p	HNSC	COAD	BRCA
83	hsa.miR.542.3p	HNSC	KICH	BRCA
84	hsa.miR.450b.5p	HNSC	KICH	BRCA
85	hsa.miR.195.5p	KIRC	BRCA	CESC
86	hsa.miR.181c.5p	HNSC	KIRC	CESC
87	hsa.miR.628.5p	KICH	KIRC	BRCA
88	hsa.miR.99a.5p	HNSC	KIRP	BRCA
89	hsa.miR.2355.5p	HNSC	KIRP	CESC
90	hsa.miR.505.5p	HNSC	KICH	KIRP
91	hsa.miR.181b.5p	LGG	HNSC	BRCA
92	hsa.miR.28.3p	LGG	HNSC	KIRC
93	hsa.miR.664b.3p	LGG	KICH	KIRP
94	hsa.miR.196b.5p	COAD	LIHC	BRCA
95	hsa.miR.502.3p	HNSC	LIHC	CESC
96	hsa.miR.18a.5p	HNSC	LIHC	CESC
97	hsa.miR.1307.3p	HNSC	LIHC	KICH
98	hsa.miR.320b	LGG	LUAD	KIRP
99	hsa.let.7i.5p	LUSC	KIRP	BRCA
100	hsa.miR.3613.5p	LGG	LUSC	LIHC
101	hsa.miR.3653.3p	COAD	KIRC	OV
102	hsa.miR.106b.5p	COAD	LIHC	OV
103	hsa.miR.191.5p	HNSC	COAD	PRAD
104	hsa.miR.141.3p	HNSC	KICH	PRAD
105	hsa.miR.134.5p	KIRP	PRAD	BRCA
106	hsa.miR.7.1.3p	KIRC	KIRP	PRAD
107	hsa.miR.1296.5p	LGG	HNSC	PRAD
108	hsa.miR.379.5p	PRAD	BRCA	OV
109	hsa.let.7b.3p	HNSC	BRCA	SKCM
110	hsa.miR.192.5p	KIRC	BRCA	SKCM
111	hsa.miR.505.3p	KIRP	BRCA	SKCM
112	hsa.miR.625.3p	LGG	CESC	SKCM
113	hsa.miR.221.3p	LGG	KIRC	SKCM
114	hsa.miR.1307.5p	LIHC	KICH	SKCM
115	hsa.miR.330.3p	LUAD	KIRP	SKCM
116	hsa.miR.182.5p	LUSC	KIRP	SKCM
117	hsa.miR.425.3p	BRCA	OV	SKCM
118	hsa.miR.203a.3p	BLCA	PRAD	SKCM
119	hsa.miR.1306.5p	READ	KICH	SKCM
120	hsa.miR.326	LUAD	READ	SKCM
121	hsa.miR.365a.3p	HNSC	STAD	BLCA
122	hsa.miR.365b.3p	HNSC	STAD	BLCA
123	hsa.miR.193b.3p	LGG	HNSC	STAD
124	hsa.miR.145.3p	STAD	LIHC	BRCA
125	hsa.miR.125b.5p	STAD	BRCA	SKCM
126	hsa.miR.345.5p	THCA	COAD	BRCA
127	hsa.miR.4677.3p	HNSC	THCA	BLCA
128	hsa.miR.126.5p	THCA	KIRC	BRCA
129	hsa.miR.497.5p	THCA	KIRC	BRCA
130	hsa.miR.454.3p	HNSC	THCA	KIRP
131	hsa.miR.339.3p	THCA	LUSC	BRCA
132	hsa.miR.16.2.3p	THCA	LUSC	KIRC
133	hsa.miR.423.5p	THCA	LUSC	KIRP
134	hsa.miR.151a.3p	THCA	LIHC	PRAD
135	hsa.miR.30e.5p	THCA	BRCA	SKCM
136	hsa.miR.342.5p	THCA	CESC	SKCM
137	hsa.miR.340.3p	HNSC	THCA	SKCM
138	hsa.miR.671.5p	HNSC	THCA	SKCM
139	hsa.miR.29c.5p	THCA	LUSC	SKCM
140	hsa.miR.361.3p	LGG	CESC	UCEC
141	hsa.let.7a.5p	THCA	UCEC	SKCM
142	hsa.miR.378a.5p	BRCA	CESC
143	hsa.miR.199a.3p	HNSC	BRCA
144	hsa.miR.199b.3p	HNSC	BRCA
145	hsa.miR.23b.3p	HNSC	COAD
146	hsa.miR.181a.5p	KIRC	BRCA
147	hsa.miR.424.5p	KIRC	BRCA
148	hsa.miR.181d.5p	KIRC	CESC
149	hsa.miR.429	HNSC	KIRC
150	hsa.miR.708.5p	KIRP	BRCA
151	hsa.miR.30d.5p	KIRC	KIRP
152	hsa.miR.181a.3p	LGG	BRCA
153	hsa.miR.584.5p	LGG	HNSC
154	hsa.miR.107	LGG	HNSC
155	hsa.miR.30a.5p	LGG	HNSC
156	hsa.miR.589.5p	LGG	HNSC
157	hsa.miR.222.3p	LGG	KICH
158	hsa.miR.190a.5p	LGG	KIRP
159	hsa.miR.484	LGG	KIRP
160	hsa.miR.744.3p	LIHC	BRCA
161	hsa.miR.210.3p	LIHC	CESC
162	hsa.miR.500a.5p	HNSC	LIHC
163	hsa.miR.500b.5p	HNSC	LIHC
164	hsa.miR.324.3p	LIHC	KICH
165	hsa.miR.30e.3p	LUAD	BRCA
166	hsa.miR.181c.3p	HNSC	LUAD
167	hsa.miR.4746.5p	LUSC	CESC
168	hsa.miR.3074.5p	LUSC	COAD
169	hsa.miR.15b.5p	LGG	LUSC
170	hsa.let.7d.5p	LUAD	LUSC
171	hsa.miR.1301.3p	HNSC	OV
172	hsa.miR.139.3p	LIHC	OV
173	hsa.miR.132.3p	LUSC	OV
174	hsa.miR.4662a.5p	BLCA	PRAD
175	hsa.miR.382.5p	PRAD	BRCA
176	hsa.miR.127.3p	PRAD	BRCA
177	hsa.miR.92a.3p	PRAD	CESC
178	hsa.miR.1180.3p	KIRC	PRAD
179	hsa.miR.10a.5p	LGG	PRAD
180	hsa.miR.199b.5p	READ	BRCA
181	hsa.miR.26b.5p	READ	BRCA
182	hsa.miR.744.5p	READ	KICH
183	hsa.miR.193a.5p	LGG	READ
184	hsa.miR.218.5p	BRCA	SKCM
185	hsa.miR.3615	LGG	SKCM
186	hsa.miR.27b.5p	LGG	SKCM
187	hsa.miR.183.5p	LUSC	SKCM
188	hsa.miR.1976	READ	SKCM
189	hsa.miR.328.3p	STAD	BRCA
190	hsa.miR.214.5p	STAD	BRCA
191	hsa.miR.378a.3p	STAD	CESC
192	hsa.miR.125a.5p	HNSC	STAD
193	hsa.miR.1287.5p	STAD	KIRC
194	hsa.miR.194.5p	STAD	OV
195	hsa.miR.181a.2.3p	STAD	SKCM
196	hsa.miR.140.5p	THCA	BRCA
197	hsa.miR.151a.5p	HNSC	THCA
198	hsa.miR.423.3p	HNSC	THCA
199	hsa.miR.362.5p	HNSC	THCA
200	hsa.miR.576.5p	HNSC	THCA
201	hsa.miR.590.5p	HNSC	THCA
202	hsa.miR.374a.5p	THCA	KIRP
203	hsa.let.7e.3p	THCA	KIRP
204	hsa.miR.30a.3p	LGG	THCA
205	hsa.miR.22.3p	LGG	THCA
206	hsa.miR.375	THCA	LIHC
207	hsa.miR.140.3p	THCA	OV
208	hsa.miR.199a.5p	THCA	OV
209	hsa.miR.335.5p	THCA	PRAD
210	hsa.miR.27a.5p	THCA	STAD
211	hsa.miR.224.5p	BRCA	UCEC
212	hsa.miR.455.5p	KIRC	UCEC
213	hsa.miR.1266.5p	KIRP	UCEC
214	hsa.miR.17.3p	OV	UCEC
215	hsa.let.7d.3p	READ	UCEC
216	hsa.miR.629.5p	UCEC	SKCM
217	hsa.miR.32.5p	BLCA
218	hsa.let.7g.3p	BRCA
219	hsa.miR.337.3p	BRCA
220	hsa.miR.24.2.5p	BRCA
221	hsa.miR.675.3p	BRCA
222	hsa.miR.652.3p	BRCA
223	hsa.miR.455.3p	BRCA
224	hsa.let.7c.3p	BRCA
225	hsa.miR.92b.3p	BRCA
226	hsa.miR.205.5p	BRCA
227	hsa.miR.127.5p	BRCA
228	hsa.miR.766.3p	BRCA
229	hsa.miR.212.3p	CESC
230	hsa.miR.16.1.3p	CESC
231	hsa.miR.203b.3p	COAD
232	hsa.miR.92a.1.5p	COAD
233	hsa.miR.29b.3p	HNSC
234	hsa.miR.2355.3p	HNSC
235	hsa.miR.221.5p	HNSC
236	hsa.miR.3127.5p	HNSC
237	hsa.miR.450a.5p	HNSC
238	hsa.miR.582.5p	HNSC
239	hsa.miR.197.3p	HNSC
240	hsa.miR.34c.3p	HNSC
241	hsa.miR.503.5p	KICH
242	hsa.miR.625.5p	KICH
243	hsa.miR.130b.5p	KICH
244	hsa.miR.542.5p	KICH
245	hsa.miR.891a.5p	KICH
246	hsa.miR.141.5p	KICH
247	hsa.miR.222.5p	KICH
248	hsa.miR.10b.3p	KIRC
249	hsa.miR.501.5p	KIRC
250	hsa.miR.26b.3p	KIRC
251	hsa.miR.1.3p	KIRC
252	hsa.miR.708.3p	KIRP
253	hsa.miR.320a	KIRP
254	hsa.miR.130b.3p	KIRP
255	hsa.miR.193a.3p	KIRP
256	hsa.miR.15b.3p	LGG
257	hsa.miR.30d.3p	LGG
258	hsa.miR.217	LGG
259	hsa.miR.3065.5p	LGG
260	hsa.miR.34a.5p	LGG
261	hsa.miR.27a.3p	LGG
262	hsa.miR.34c.5p	LGG
263	hsa.miR.22.5p	LGG
264	hsa.miR.30c.2.3p	LGG
265	hsa.miR.664a.5p	LGG
266	hsa.miR.204.5p	LGG
267	hsa.miR.105.5p	LGG
268	hsa.miR.574.3p	LGG
269	hsa.miR.33a.5p	LGG
270	hsa.miR.885.5p	LIHC
271	hsa.miR.362.3p	LIHC
272	hsa.miR.532.3p	LIHC
273	hsa.miR.324.5p	LIHC
274	hsa.miR.185.3p	LUAD
275	hsa.miR.136.3p	LUSC
276	hsa.miR.487b.3p	LUSC
277	hsa.miR.128.1.5p	LUSC
278	hsa.miR.889.3p	LUSC
279	hsa.miR.937.3p	OV
280	hsa.miR.6892.5p	OV
281	hsa.miR.187.3p	OV
282	hsa.miR.760	OV
283	hsa.miR.135a.5p	PRAD
284	hsa.miR.20b.3p	PRAD
285	hsa.miR.411.5p	PRAD
286	hsa.miR.106a.5p	PRAD
287	hsa.miR.654.3p	PRAD
288	hsa.miR.20b.5p	PRAD
289	hsa.miR.24.1.5p	READ
290	hsa.miR.1247.3p	READ
291	hsa.miR.1247.5p	READ
292	hsa.miR.3917	SKCM
293	hsa.miR.514a.3p	SKCM
294	hsa.miR.511.5p	SKCM
295	hsa.miR.219a.1.3p	SKCM
296	hsa.miR.509.3p	SKCM
297	hsa.miR.508.3p	SKCM
298	hsa.miR.758.3p	STAD
299	hsa.miR.125a.3p	THCA
300	hsa.miR.29a.5p	THCA
301	hsa.miR.148b.3p	THCA
302	hsa.miR.874.3p	THCA
303	hsa.miR.29b.2.5p	THCA
304	hsa.miR.671.3p	THCA
305	hsa.let.7a.3p	UCEC

## Sheet: lncRNA_marker_distribution
number	lncRNA	cancer1	cancer2
1	ENSG00000233534.1	BLCA	CESC
2	ENSG00000238176.1	KIRP	CESC
3	ENSG00000248869.1	KIRC	KIRP
4	ENSG00000227306.1	LGG	BLCA
5	ENSG00000261538.1	LGG	HNSC
6	ENSG00000255480.1	LIHC	BLCA
7	ENSG00000233123.1	HNSC	LIHC
8	ENSG00000247130.2	LIHC	KIRC
9	ENSG00000237819.1	LGG	LIHC
10	ENSG00000249917.2	LGG	LIHC
11	ENSG00000258696.1	BLCA	OV
12	ENSG00000228162.1	LUSC	PRAD
13	ENSG00000255545.3	READ	KIRP
14	ENSG00000259926.1	CESC	SKCM
15	ENSG00000253690.1	LGG	SKCM
16	ENSG00000255005.1	LIHC	SKCM
17	ENSG00000228573.1	LIHC	SKCM
18	ENSG00000261453.1	LUAD	SKCM
19	ENSG00000235024.1	PRAD	SKCM
20	ENSG00000269256.1	PRAD	SKCM
21	ENSG00000260832.1	STAD	BRCA
22	ENSG00000232183.1	HNSC	STAD
23	ENSG00000244128.1	LUAD	STAD
24	ENSG00000236889.1	BLCA
25	ENSG00000255233.1	BLCA
26	ENSG00000225269.2	BLCA
27	ENSG00000267073.1	BLCA
28	ENSG00000260101.1	BLCA
29	ENSG00000253842.1	BLCA
30	ENSG00000232053.2	BLCA
31	ENSG00000228925.1	BLCA
32	ENSG00000226722.2	BLCA
33	ENSG00000227935.1	BLCA
34	ENSG00000232480.1	BLCA
35	ENSG00000262038.1	BLCA
36	ENSG00000256268.1	BLCA
37	ENSG00000247311.2	BLCA
38	ENSG00000258400.1	BLCA
39	ENSG00000207955.2	BLCA
40	ENSG00000272710.1	BLCA
41	ENSG00000267606.1	BLCA
42	ENSG00000259561.1	BLCA
43	ENSG00000226115.1	BLCA
44	ENSG00000267279.1	BLCA
45	ENSG00000272342.1	BLCA
46	ENSG00000265174.1	BLCA
47	ENSG00000256717.1	BLCA
48	ENSG00000236231.1	BLCA
49	ENSG00000267437.1	BLCA
50	ENSG00000255491.1	BLCA
51	ENSG00000231298.2	BLCA
52	ENSG00000271958.1	BLCA
53	ENSG00000261161.1	BLCA
54	ENSG00000269729.1	BLCA
55	ENSG00000250885.1	BRCA
56	ENSG00000232464.1	BRCA
57	ENSG00000264734.1	BRCA
58	ENSG00000258162.1	BRCA
59	ENSG00000264825.1	BRCA
60	ENSG00000264080.1	BRCA
61	ENSG00000248588.1	BRCA
62	ENSG00000260877.1	BRCA
63	ENSG00000237104.1	BRCA
64	ENSG00000248698.1	BRCA
65	ENSG00000236347.1	BRCA
66	ENSG00000227475.1	BRCA
67	ENSG00000226780.1	BRCA
68	ENSG00000251679.1	BRCA
69	ENSG00000236948.1	BRCA
70	ENSG00000257771.1	BRCA
71	ENSG00000260926.2	BRCA
72	ENSG00000258631.2	BRCA
73	ENSG00000250180.1	BRCA
74	ENSG00000224944.1	BRCA
75	ENSG00000255332.3	BRCA
76	ENSG00000229297.1	BRCA
77	ENSG00000254391.1	BRCA
78	ENSG00000267223.1	BRCA
79	ENSG00000249392.1	BRCA
80	ENSG00000253397.1	BRCA
81	ENSG00000233850.1	BRCA
82	ENSG00000253838.1	CESC
83	ENSG00000230525.1	CESC
84	ENSG00000267327.1	CESC
85	ENSG00000235189.1	CESC
86	ENSG00000243018.1	CESC
87	ENSG00000237179.1	CESC
88	ENSG00000258035.1	CESC
89	ENSG00000261615.2	CESC
90	ENSG00000255871.2	CESC
91	ENSG00000260064.1	CESC
92	ENSG00000197251.3	CESC
93	ENSG00000223446.1	CESC
94	ENSG00000263765.1	CESC
95	ENSG00000229961.1	CESC
96	ENSG00000259734.1	CESC
97	ENSG00000256560.1	CESC
98	ENSG00000205056.8	CESC
99	ENSG00000249618.1	CESC
100	ENSG00000231149.2	CESC
101	ENSG00000261632.1	CESC
102	ENSG00000265413.1	CESC
103	ENSG00000261471.1	CESC
104	ENSG00000237343.1	CESC
105	ENSG00000248991.1	CESC
106	ENSG00000240219.1	CESC
107	ENSG00000266923.1	CESC
108	ENSG00000258393.1	CESC
109	ENSG00000236197.2	CESC
110	ENSG00000255354.1	CESC
111	ENSG00000254287.1	CESC
112	ENSG00000250129.1	CESC
113	ENSG00000261722.1	CESC
114	ENSG00000226548.1	CESC
115	ENSG00000224077.1	CESC
116	ENSG00000227145.1	CESC
117	ENSG00000257322.1	CESC
118	ENSG00000234184.1	CESC
119	ENSG00000230782.1	CESC
120	ENSG00000258693.1	CESC
121	ENSG00000261695.1	CESC
122	ENSG00000255858.1	CESC
123	ENSG00000230292.1	CESC
124	ENSG00000250338.1	CESC
125	ENSG00000230794.1	CESC
126	ENSG00000248673.1	CESC
127	ENSG00000228741.2	COAD
128	ENSG00000224959.1	COAD
129	ENSG00000249550.2	COAD
130	ENSG00000256128.1	COAD
131	ENSG00000228824.2	COAD
132	ENSG00000226367.1	COAD
133	ENSG00000247134.2	COAD
134	ENSG00000233215.1	COAD
135	ENSG00000228939.1	HNSC
136	ENSG00000230876.2	HNSC
137	ENSG00000260919.1	HNSC
138	ENSG00000248370.1	HNSC
139	ENSG00000261646.1	HNSC
140	ENSG00000223536.1	HNSC
141	ENSG00000237346.1	HNSC
142	ENSG00000240527.1	HNSC
143	ENSG00000271848.1	HNSC
144	ENSG00000224375.1	HNSC
145	ENSG00000237321.1	HNSC
146	ENSG00000266664.1	HNSC
147	ENSG00000227083.1	HNSC
148	ENSG00000226258.2	HNSC
149	ENSG00000236827.1	HNSC
150	ENSG00000226741.1	HNSC
151	ENSG00000263688.1	HNSC
152	ENSG00000236837.1	HNSC
153	ENSG00000225313.2	HNSC
154	ENSG00000236894.2	HNSC
155	ENSG00000254574.1	HNSC
156	ENSG00000223466.1	HNSC
157	ENSG00000248143.1	HNSC
158	ENSG00000253311.1	HNSC
159	ENSG00000265400.1	HNSC
160	ENSG00000269553.1	HNSC
161	ENSG00000228382.1	HNSC
162	ENSG00000251542.1	HNSC
163	ENSG00000253539.1	HNSC
164	ENSG00000257226.1	HNSC
165	ENSG00000257870.1	HNSC
166	ENSG00000255689.1	KICH
167	ENSG00000271752.1	KICH
168	ENSG00000231811.2	KICH
169	ENSG00000251533.2	KICH
170	ENSG00000236268.1	KICH
171	ENSG00000248416.1	KICH
172	ENSG00000234902.2	KICH
173	ENSG00000258558.1	KICH
174	ENSG00000228369.2	KICH
175	ENSG00000231185.2	KICH
176	ENSG00000237212.1	KICH
177	ENSG00000251652.1	KICH
178	ENSG00000225721.1	KICH
179	ENSG00000223675.1	KICH
180	ENSG00000257272.1	KICH
181	ENSG00000232940.1	KICH
182	ENSG00000227431.1	KICH
183	ENSG00000228150.1	KICH
184	ENSG00000254044.1	KICH
185	ENSG00000259463.1	KICH
186	ENSG00000228540.1	KICH
187	ENSG00000226604.2	KICH
188	ENSG00000271959.1	KICH
189	ENSG00000234506.1	KICH
190	ENSG00000258437.1	KICH
191	ENSG00000257285.1	KICH
192	ENSG00000253170.1	KICH
193	ENSG00000226664.1	KICH
194	ENSG00000254300.1	KIRC
195	ENSG00000258419.1	KIRC
196	ENSG00000261786.1	KIRC
197	ENSG00000214407.3	KIRC
198	ENSG00000260364.1	KIRC
199	ENSG00000253503.1	KIRC
200	ENSG00000258225.1	KIRC
201	ENSG00000258854.1	KIRC
202	ENSG00000259773.1	KIRC
203	ENSG00000258910.2	KIRC
204	ENSG00000261398.1	KIRC
205	ENSG00000205562.1	KIRC
206	ENSG00000253161.1	KIRC
207	ENSG00000233508.1	KIRC
208	ENSG00000263207.2	KIRC
209	ENSG00000254930.1	KIRC
210	ENSG00000227938.1	KIRC
211	ENSG00000241151.1	KIRC
212	ENSG00000251518.1	KIRC
213	ENSG00000235943.1	KIRC
214	ENSG00000259827.1	KIRC
215	ENSG00000232959.1	KIRC
216	ENSG00000224048.1	KIRC
217	ENSG00000235884.2	KIRC
218	ENSG00000223795.2	KIRC
219	ENSG00000239922.1	KIRC
220	ENSG00000259847.1	KIRC
221	ENSG00000261925.1	KIRC
222	ENSG00000253746.1	KIRC
223	ENSG00000251257.1	KIRC
224	ENSG00000272457.1	KIRC
225	ENSG00000226476.2	KIRC
226	ENSG00000255002.1	KIRC
227	ENSG00000241168.1	KIRC
228	ENSG00000258791.3	KIRC
229	ENSG00000227101.1	KIRC
230	ENSG00000271167.1	KIRC
231	ENSG00000249145.1	KIRC
232	ENSG00000259283.2	KIRC
233	ENSG00000231426.1	KIRC
234	ENSG00000236591.1	KIRC
235	ENSG00000237638.1	KIRC
236	ENSG00000224513.2	KIRC
237	ENSG00000233840.1	KIRC
238	ENSG00000271409.1	KIRC
239	ENSG00000224671.1	KIRC
240	ENSG00000261696.1	KIRC
241	ENSG00000225148.1	KIRC
242	ENSG00000248986.1	KIRC
243	ENSG00000234156.1	KIRC
244	ENSG00000271192.1	KIRC
245	ENSG00000266924.1	KIRC
246	ENSG00000260695.1	KIRC
247	ENSG00000230686.1	KIRC
248	ENSG00000235902.1	KIRP
249	ENSG00000249451.1	KIRP
250	ENSG00000251461.3	KIRP
251	ENSG00000260835.1	KIRP
252	ENSG00000257582.1	KIRP
253	ENSG00000256661.1	KIRP
254	ENSG00000243574.1	KIRP
255	ENSG00000269898.1	KIRP
256	ENSG00000235731.1	KIRP
257	ENSG00000251002.3	KIRP
258	ENSG00000235085.2	KIRP
259	ENSG00000249334.1	KIRP
260	ENSG00000254111.1	KIRP
261	ENSG00000259551.1	KIRP
262	ENSG00000267013.1	KIRP
263	ENSG00000265316.1	LGG
264	ENSG00000225649.1	LGG
265	ENSG00000257683.1	LGG
266	ENSG00000245694.4	LGG
267	ENSG00000272382.1	LGG
268	ENSG00000204277.1	LGG
269	ENSG00000258662.1	LGG
270	ENSG00000250786.1	LGG
271	ENSG00000205325.1	LGG
272	ENSG00000230489.1	LGG
273	ENSG00000231290.1	LGG
274	ENSG00000256249.1	LGG
275	ENSG00000259763.1	LGG
276	ENSG00000249959.1	LGG
277	ENSG00000231609.1	LGG
278	ENSG00000223823.1	LGG
279	ENSG00000249641.2	LGG
280	ENSG00000256803.1	LGG
281	ENSG00000254227.1	LGG
282	ENSG00000237560.1	LGG
283	ENSG00000234787.3	LGG
284	ENSG00000233625.1	LGG
285	ENSG00000227308.2	LGG
286	ENSG00000266985.1	LGG
287	ENSG00000258943.1	LGG
288	ENSG00000236106.1	LGG
289	ENSG00000259203.1	LGG
290	ENSG00000234567.1	LGG
291	ENSG00000259478.2	LGG
292	ENSG00000232212.1	LGG
293	ENSG00000258717.1	LGG
294	ENSG00000254675.1	LGG
295	ENSG00000250133.2	LGG
296	ENSG00000267521.1	LGG
297	ENSG00000248790.1	LGG
298	ENSG00000260677.1	LGG
299	ENSG00000225765.1	LGG
300	ENSG00000229337.1	LGG
301	ENSG00000253924.1	LGG
302	ENSG00000259711.1	LGG
303	ENSG00000260484.1	LGG
304	ENSG00000259446.1	LGG
305	ENSG00000227987.1	LGG
306	ENSG00000231107.1	LGG
307	ENSG00000236272.1	LGG
308	ENSG00000267374.1	LGG
309	ENSG00000235151.1	LGG
310	ENSG00000259855.1	LGG
311	ENSG00000249125.1	LGG
312	ENSG00000265752.2	LGG
313	ENSG00000266869.1	LGG
314	ENSG00000257663.1	LGG
315	ENSG00000228630.1	LGG
316	ENSG00000271384.1	LGG
317	ENSG00000231651.1	LGG
318	ENSG00000261295.1	LGG
319	ENSG00000258754.3	LGG
320	ENSG00000234455.1	LGG
321	ENSG00000224265.1	LGG
322	ENSG00000231335.1	LGG
323	ENSG00000259542.1	LGG
324	ENSG00000260575.1	LGG
325	ENSG00000257472.1	LGG
326	ENSG00000253880.1	LGG
327	ENSG00000265758.1	LGG
328	ENSG00000259150.1	LGG
329	ENSG00000249304.1	LGG
330	ENSG00000256298.1	LGG
331	ENSG00000259275.1	LGG
332	ENSG00000251372.1	LGG
333	ENSG00000260057.1	LGG
334	ENSG00000270036.1	LGG
335	ENSG00000237377.2	LGG
336	ENSG00000230394.1	LGG
337	ENSG00000249406.1	LGG
338	ENSG00000256884.1	LGG
339	ENSG00000267147.1	LGG
340	ENSG00000227954.2	LGG
341	ENSG00000265000.1	LGG
342	ENSG00000227117.2	LGG
343	ENSG00000227360.1	LGG
344	ENSG00000260597.1	LGG
345	ENSG00000229971.1	LGG
346	ENSG00000238171.1	LGG
347	ENSG00000259276.1	LGG
348	ENSG00000236717.2	LGG
349	ENSG00000272428.1	LGG
350	ENSG00000236129.1	LGG
351	ENSG00000224698.1	LGG
352	ENSG00000237061.1	LGG
353	ENSG00000236176.2	LIHC
354	ENSG00000230319.1	LIHC
355	ENSG00000233397.1	LIHC
356	ENSG00000264769.1	LIHC
357	ENSG00000245322.2	LIHC
358	ENSG00000249395.2	LIHC
359	ENSG00000270641.1	LIHC
360	ENSG00000253395.1	LIHC
361	ENSG00000266401.1	LIHC
362	ENSG00000248323.1	LIHC
363	ENSG00000226089.2	LIHC
364	ENSG00000253832.1	LIHC
365	ENSG00000261346.1	LIHC
366	ENSG00000241048.1	LIHC
367	ENSG00000265750.1	LIHC
368	ENSG00000226935.2	LIHC
369	ENSG00000261334.1	LIHC
370	ENSG00000271715.1	LIHC
371	ENSG00000237074.1	LIHC
372	ENSG00000251093.1	LIHC
373	ENSG00000259876.1	LIHC
374	ENSG00000248668.1	LIHC
375	ENSG00000232194.1	LIHC
376	ENSG00000255067.1	LIHC
377	ENSG00000233559.1	LIHC
378	ENSG00000258731.1	LIHC
379	ENSG00000234155.1	LIHC
380	ENSG00000256969.1	LIHC
381	ENSG00000229807.5	LIHC
382	ENSG00000249173.1	LIHC
383	ENSG00000197463.8	LIHC
384	ENSG00000255525.1	LIHC
385	ENSG00000246250.2	LIHC
386	ENSG00000233246.1	LIHC
387	ENSG00000254290.1	LIHC
388	ENSG00000228221.1	LIHC
389	ENSG00000226906.1	LIHC
390	ENSG00000231200.1	LIHC
391	ENSG00000254370.1	LIHC
392	ENSG00000250174.1	LIHC
393	ENSG00000262136.1	LIHC
394	ENSG00000253711.1	LIHC
395	ENSG00000254033.1	LIHC
396	ENSG00000249487.2	LIHC
397	ENSG00000248740.1	LIHC
398	ENSG00000254761.1	LIHC
399	ENSG00000271762.1	LIHC
400	ENSG00000261446.1	LIHC
401	ENSG00000230937.5	LUAD
402	ENSG00000197462.3	LUAD
403	ENSG00000248572.1	LUAD
404	ENSG00000231098.1	LUAD
405	ENSG00000244545.1	LUAD
406	ENSG00000240707.2	LUAD
407	ENSG00000227907.1	LUAD
408	ENSG00000215162.1	LUAD
409	ENSG00000262395.1	LUAD
410	ENSG00000225561.1	LUAD
411	ENSG00000234055.1	LUAD
412	ENSG00000256315.1	LUAD
413	ENSG00000271774.1	LUAD
414	ENSG00000234626.1	LUAD
415	ENSG00000233605.1	LUSC
416	ENSG00000231138.1	LUSC
417	ENSG00000251554.1	LUSC
418	ENSG00000237477.1	LUSC
419	ENSG00000249604.1	LUSC
420	ENSG00000248228.1	LUSC
421	ENSG00000273119.1	LUSC
422	ENSG00000253220.1	LUSC
423	ENSG00000232756.1	LUSC
424	ENSG00000257612.1	LUSC
425	ENSG00000226594.1	LUSC
426	ENSG00000235533.1	LUSC
427	ENSG00000263499.1	LUSC
428	ENSG00000249279.1	LUSC
429	ENSG00000237387.1	LUSC
430	ENSG00000251654.2	LUSC
431	ENSG00000273012.1	LUSC
432	ENSG00000260131.1	LUSC
433	ENSG00000223470.2	LUSC
434	ENSG00000255817.1	LUSC
435	ENSG00000260962.1	LUSC
436	ENSG00000234862.1	LUSC
437	ENSG00000257995.1	LUSC
438	ENSG00000235445.1	LUSC
439	ENSG00000258853.1	LUSC
440	ENSG00000234117.2	LUSC
441	ENSG00000258081.3	LUSC
442	ENSG00000237336.1	LUSC
443	ENSG00000237282.3	LUSC
444	ENSG00000248285.1	LUSC
445	ENSG00000260390.1	LUSC
446	ENSG00000249694.2	LUSC
447	ENSG00000229312.2	LUSC
448	ENSG00000255119.1	LUSC
449	ENSG00000263427.1	OV
450	ENSG00000249186.1	OV
451	ENSG00000224090.1	OV
452	ENSG00000260183.1	OV
453	ENSG00000249341.1	OV
454	ENSG00000271945.1	OV
455	ENSG00000263051.1	OV
456	ENSG00000250801.1	OV
457	ENSG00000229400.1	OV
458	ENSG00000236724.1	OV
459	ENSG00000260166.1	OV
460	ENSG00000225386.1	OV
461	ENSG00000237338.1	PRAD
462	ENSG00000261367.1	PRAD
463	ENSG00000230699.2	PRAD
464	ENSG00000232084.1	PRAD
465	ENSG00000230991.1	PRAD
466	ENSG00000204011.4	PRAD
467	ENSG00000233191.1	PRAD
468	ENSG00000266925.1	PRAD
469	ENSG00000255539.1	PRAD
470	ENSG00000267255.1	PRAD
471	ENSG00000248719.1	PRAD
472	ENSG00000255169.1	PRAD
473	ENSG00000214650.2	PRAD
474	ENSG00000253567.1	PRAD
475	ENSG00000226426.1	PRAD
476	ENSG00000228417.1	PRAD
477	ENSG00000254619.1	PRAD
478	ENSG00000224849.2	PRAD
479	ENSG00000205632.2	PRAD
480	ENSG00000261460.1	PRAD
481	ENSG00000251523.1	PRAD
482	ENSG00000255094.1	PRAD
483	ENSG00000248980.1	PRAD
484	ENSG00000206552.4	PRAD
485	ENSG00000225085.1	PRAD
486	ENSG00000270697.1	PRAD
487	ENSG00000241280.1	PRAD
488	ENSG00000246790.2	READ
489	ENSG00000262179.2	READ
490	ENSG00000266795.2	READ
491	ENSG00000230658.1	READ
492	ENSG00000233928.1	SKCM
493	ENSG00000224506.2	SKCM
494	ENSG00000251301.2	SKCM
495	ENSG00000229424.1	SKCM
496	ENSG00000177133.6	SKCM
497	ENSG00000271761.1	SKCM
498	ENSG00000225546.1	SKCM
499	ENSG00000235669.1	SKCM
500	ENSG00000253509.1	SKCM
501	ENSG00000254607.2	SKCM
502	ENSG00000236256.5	SKCM
503	ENSG00000236276.1	SKCM
504	ENSG00000248359.1	SKCM
505	ENSG00000228421.2	SKCM
506	ENSG00000257284.1	SKCM
507	ENSG00000254444.1	SKCM
508	ENSG00000215498.4	SKCM
509	ENSG00000272027.1	SKCM
510	ENSG00000272874.1	SKCM
511	ENSG00000253298.1	SKCM
512	ENSG00000229206.2	SKCM
513	ENSG00000261435.1	SKCM
514	ENSG00000228604.3	SKCM
515	ENSG00000273044.1	SKCM
516	ENSG00000250024.1	SKCM
517	ENSG00000255323.1	SKCM
518	ENSG00000255045.1	SKCM
519	ENSG00000257519.1	SKCM
520	ENSG00000267593.1	SKCM
521	ENSG00000233993.1	SKCM
522	ENSG00000237407.1	SKCM
523	ENSG00000236921.1	SKCM
524	ENSG00000232613.2	SKCM
525	ENSG00000232120.1	SKCM
526	ENSG00000259149.1	SKCM
527	ENSG00000255269.1	SKCM
528	ENSG00000228650.2	SKCM
529	ENSG00000236841.3	SKCM
530	ENSG00000258345.1	SKCM
531	ENSG00000234261.1	SKCM
532	ENSG00000243944.1	SKCM
533	ENSG00000262995.1	SKCM
534	ENSG00000183242.7	SKCM
535	ENSG00000243012.1	SKCM
536	ENSG00000259591.1	SKCM
537	ENSG00000256039.1	SKCM
538	ENSG00000227227.1	SKCM
539	ENSG00000230121.1	SKCM
540	ENSG00000261090.1	SKCM
541	ENSG00000230894.1	SKCM
542	ENSG00000204460.3	SKCM
543	ENSG00000269460.1	SKCM
544	ENSG00000260971.3	SKCM
545	ENSG00000223404.3	SKCM
546	ENSG00000253184.1	SKCM
547	ENSG00000273107.1	SKCM
548	ENSG00000236866.1	SKCM
549	ENSG00000240040.1	SKCM
550	ENSG00000273409.1	SKCM
551	ENSG00000265408.1	SKCM
552	ENSG00000229105.1	SKCM
553	ENSG00000272046.1	SKCM
554	ENSG00000227352.1	SKCM
555	ENSG00000232636.2	SKCM
556	ENSG00000229228.1	SKCM
557	ENSG00000257400.1	SKCM
558	ENSG00000249290.1	SKCM
559	ENSG00000243961.2	SKCM
560	ENSG00000255847.1	SKCM
561	ENSG00000247765.1	SKCM
562	ENSG00000224857.1	SKCM
563	ENSG00000251504.1	SKCM
564	ENSG00000237220.1	SKCM
565	ENSG00000254138.1	SKCM
566	ENSG00000262898.1	SKCM
567	ENSG00000227253.2	SKCM
568	ENSG00000254008.1	SKCM
569	ENSG00000235279.1	STAD
570	ENSG00000254024.1	STAD
571	ENSG00000225676.1	STAD
572	ENSG00000249171.1	STAD
573	ENSG00000253891.1	STAD
574	ENSG00000248150.1	STAD
575	ENSG00000235335.2	STAD
576	ENSG00000231324.1	STAD
577	ENSG00000227188.1	STAD
578	ENSG00000231467.2	STAD
579	ENSG00000261063.1	THCA
580	ENSG00000237337.1	THCA
581	ENSG00000226825.1	THCA
582	ENSG00000271893.1	THCA
583	ENSG00000236115.1	THCA
584	ENSG00000257548.1	THCA
585	ENSG00000247867.2	THCA
586	ENSG00000251041.1	THCA
587	ENSG00000228705.1	THCA
588	ENSG00000223432.1	THCA
589	ENSG00000203266.2	THCA
590	ENSG00000234105.1	THCA
591	ENSG00000266304.1	THCA
592	ENSG00000248996.1	THCA
593	ENSG00000249731.1	THCA
594	ENSG00000232749.1	THCA
595	ENSG00000271593.1	THCA
596	ENSG00000254291.1	THCA
597	ENSG00000229846.1	THCA
598	ENSG00000256837.1	THCA
599	ENSG00000230768.3	UCEC
